# Supplementary material for: Protein Levels of Several Arabidopsis Auxin Response Factors Are Regulated by Multiple Factors and ABA Promotes ARF6 Protein Ubiquitination
Source: Int J Mol Sci. 2020 Dec 11;21(24):9437. doi: 10.3390/ijms21249437 (PMC7763875; doi:10.3390/ijms21249437)
Supplement: Supplementary file 1 [file ijms-21-09437-s001.zip › Li et al_Supplementary Materials_Final/Table S1_Ct values_Temperatrue, ABA and NaCl treatments_LK.xlsx]

## Sheet: Ct value
Table S1. Ct values from qPCR analysis of HA-ARF6 and At4g33380
	Control (22°C)				37°C				4°C
	Sample1	Sample2	Sample3	Sample4	Sample1	Sample2	Sample3	Sample4	Sample1	Sample2	Sample3	Sample4
HA-ARF6	21.9251	22.0929	21.7164	21.9563	22.1436	22.6199	22.5629	22.5056	22.068	21.7561	22.2217	22.3851
	21.6975	21.9321	21.567	21.0986	21.9406	22.3671	22.2147	22.342	21.8251	21.4745	22.0504	22.1035
	21.7605	21.8767	21.8395	22.0135	22.0233	22.3819	22.3682	22.3957	21.7915	21.5333	22.1046	22.36
	21.6743	21.8305	21.7593	21.6508	21.7812	22.2188	22.1805	22.1348	21.6111	21.2591	21.8427
At4g33380	23.5921	23.6613	23.3296	23.5179	23.741	24.1763	24.0438	24.0431	24.1838	24.4122	24.8073	24.9199
	23.5623	23.5923	23.3638	23.459	23.7617	24.1615	24.1294	24.1911	24.1911	24.2475	24.3826	24.5022
	23.718	23.7048	23.3704	23.7174	24.0407	24.1969	24.398	24.2611	24.2265	24.568	24.6782	25.0078
	23.9609	23.7338	23.525	23.6211	24.0065	24.1724	24.2024	24.3385	24.2948	24.4037	24.5839	24.7595
	Control			ABA			NaCl
	Sample1	Sample2	Sample3	Sample1	Sample2	Sample3	Sample1	Sample2	Sample3
HA-ARF6	23.137	23.1044	23.3321	24.2842	24.405	24.2302	24.7816	25.3475	24.0048
	22.9061	23.1799	23.3347	24.526	24.5198	24.3177	24.0261	25.0522	23.2493
	23.127	23.0648	23.7002	24.6357	24.5883	24.2299	24.0879	25.0873	23.8835
	23.2343	23.0129	23.0806	24.0272	24.1627	24.0367	23.7983	24.6936	23.5237
At4g33380	24.9774	25.2149	25.2378	26.0703	26.0363	26.5979	26.8122	28.048	25.6335
	24.8524	25.2154	25.3687	25.4538	26.1883	27.1156	26.4332	27.8659	25.6372
	25.1989	25.5168	25.7199	26.1792	26.0341	27.287	26.709	27.9045	25.9745
	25.4486	25.6628	25.9362	26.4566	26.2673	27.1426	26.2811	27.9517
Notes:	For the temperature treatments, there were three biological samples with four technical repeats for each biological sample.
	For ABA and NaCl treatments, there were four biological samples with four technical repeats for each biological sample.
	The Ct values for the four technical repeats are listed under the sample.
